# Supplementary material
Source: PubMed Central journal article supplement (PMC8738129)

**A**

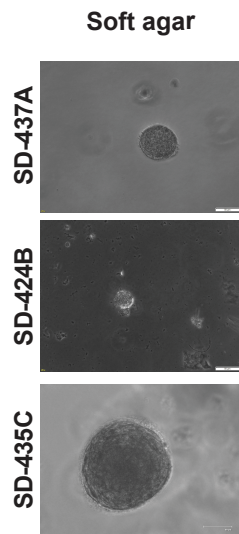

**B**

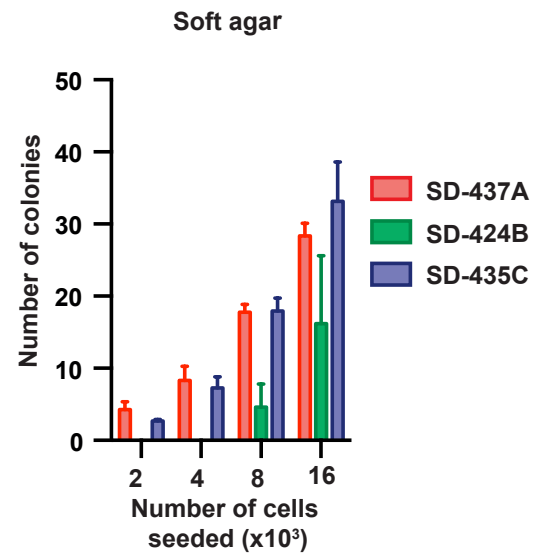

**C**

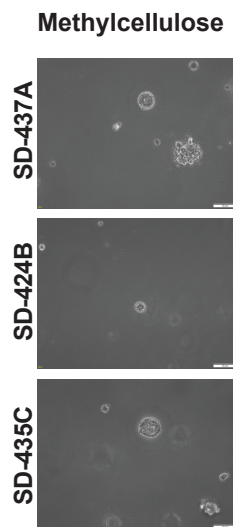

**D**

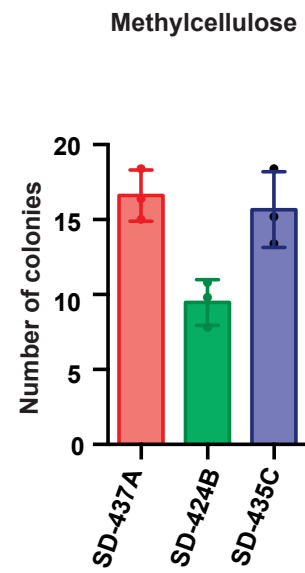

Supplement: NIHMS1736610-supplement-2.pdf [file NIHMS1736610-supplement-2.pdf]

A

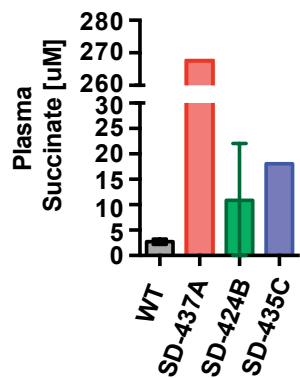

B

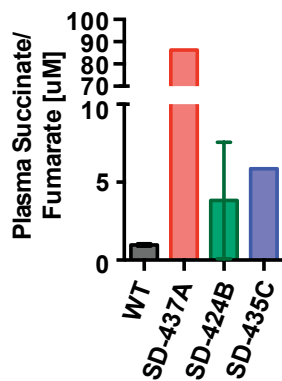

C

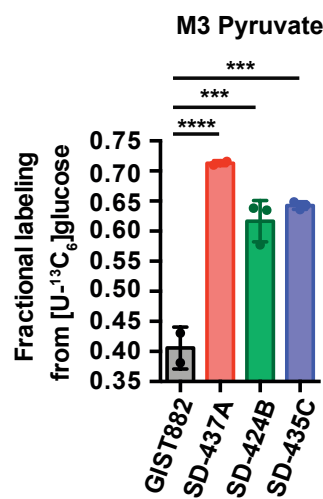

D

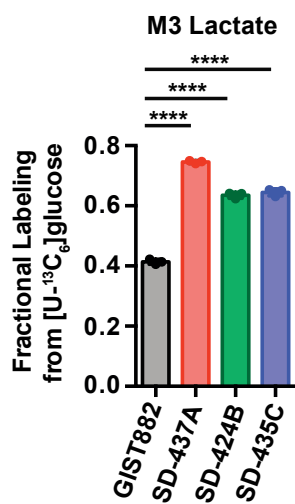

E

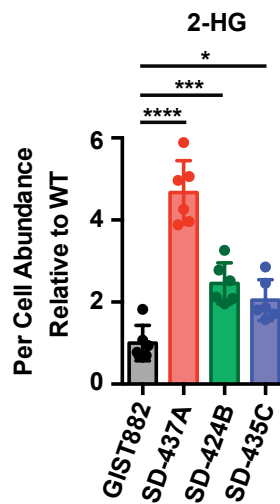

F

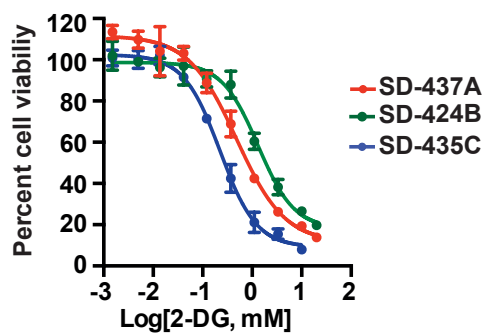

G

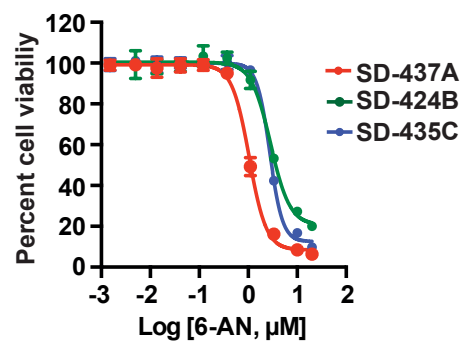

Supplement: NIHMS1736610-supplement-3.pdf [file NIHMS1736610-supplement-3.pdf]

**A**

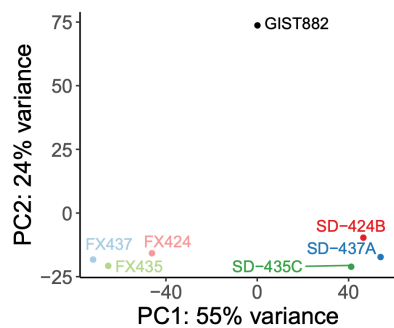

**B**

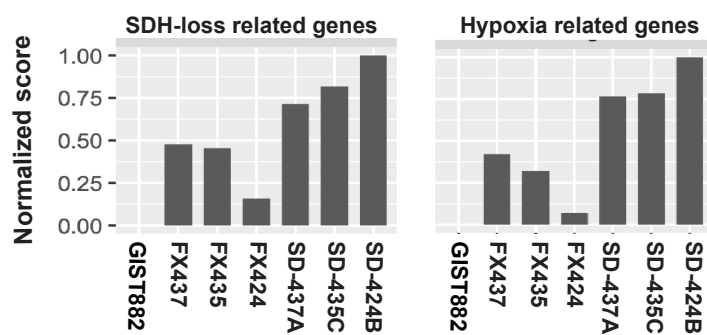

**C**

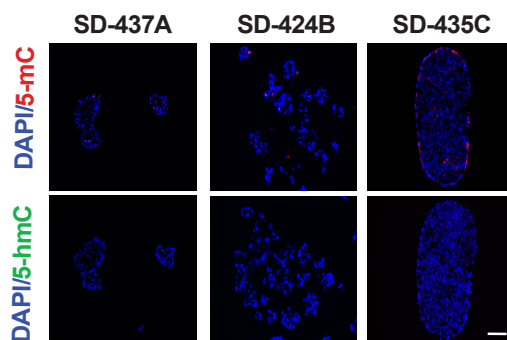

Supplement: NIHMS1736610-supplement-4.pdf [file NIHMS1736610-supplement-4.pdf]

A

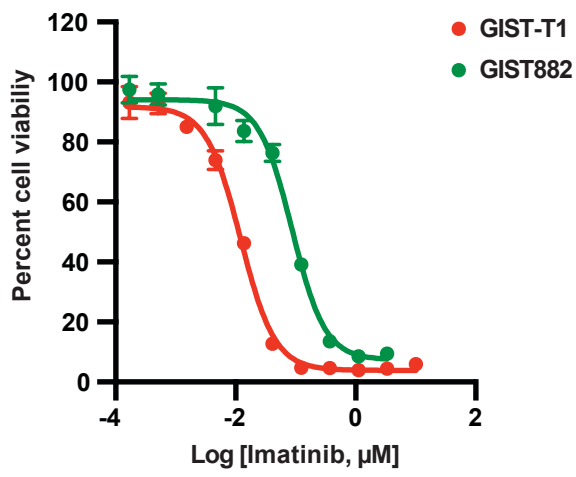

B

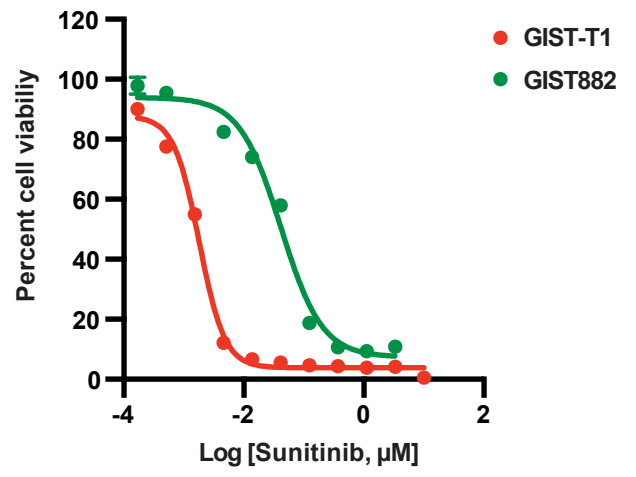

Supplement: NIHMS1736610-supplement-5.pdf [file NIHMS1736610-supplement-5.pdf]

**A**

Superior

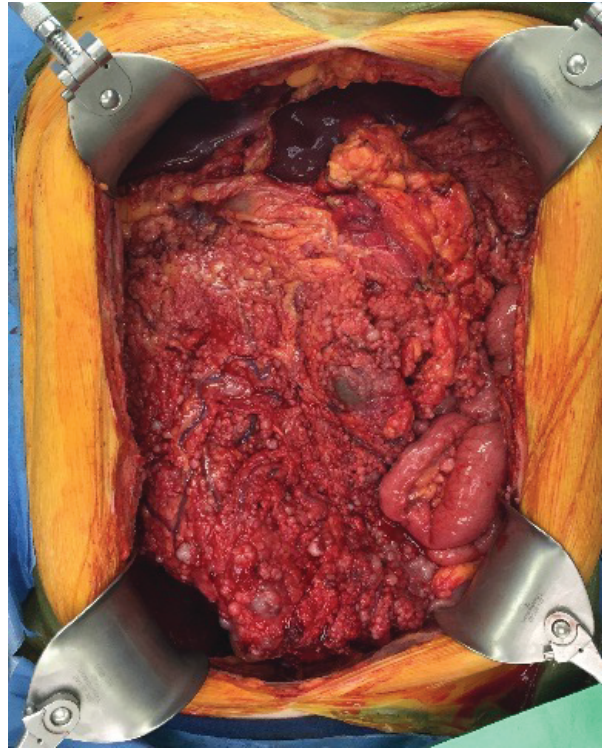

Inferior

**B**

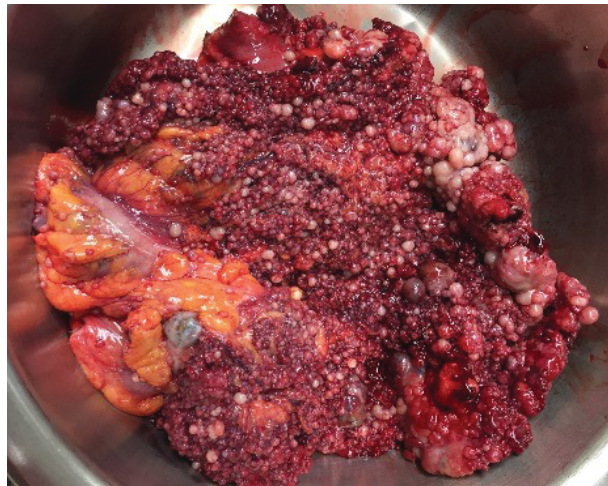

Supplement: NIHMS1736610-supplement-6.pdf [file NIHMS1736610-supplement-6.pdf]
